# Supplementary material for: Prostaglandin E2 promotes Th1 differentiation via synergistic amplification of IL-12 signalling by cAMP and PI3-kinase
Source: PubMed Central journal article supplement — Nat Commun. 2013 Apr 9;4:1685–. doi: 10.1038/ncomms2684 (PMC3644078; doi:10.1038/ncomms2684), 2013-04-09
Supplement: ncomms2684-s1.pdf [file ncomms2684-s1.pdf]

**Supplementary Information for**  
**Prostaglandin E<sub>2</sub> promotes Th1 differentiation via synergistic**  
**amplification of IL-12 signaling by cAMP and PI3-Kinase**

Chengcan Yao, Takako Hirata, Kitipong Soontrapa, Xiaojun Ma, Hiroshi Takemori and  
Shuh Narumiya\*

\*To whom correspondence should be addressed. E-mail: snaru@mfour.med.kyoto-u.ac.jp

Supplementary Figure S1. PGE<sub>2</sub>–EP2/EP4 signaling induces IL-12Rβ2 expression in  
TCR-activated CD4<sup>+</sup> T cells.

Supplementary Table S1. Primer sets used for real-time PCR.

Supplementary Table S2. Primer sets used for *Il12rb2* gene locus in ChIP assay.

Supplementary Table S3. Primer sets used for *Ifngr1* gene locus in ChIP assay.

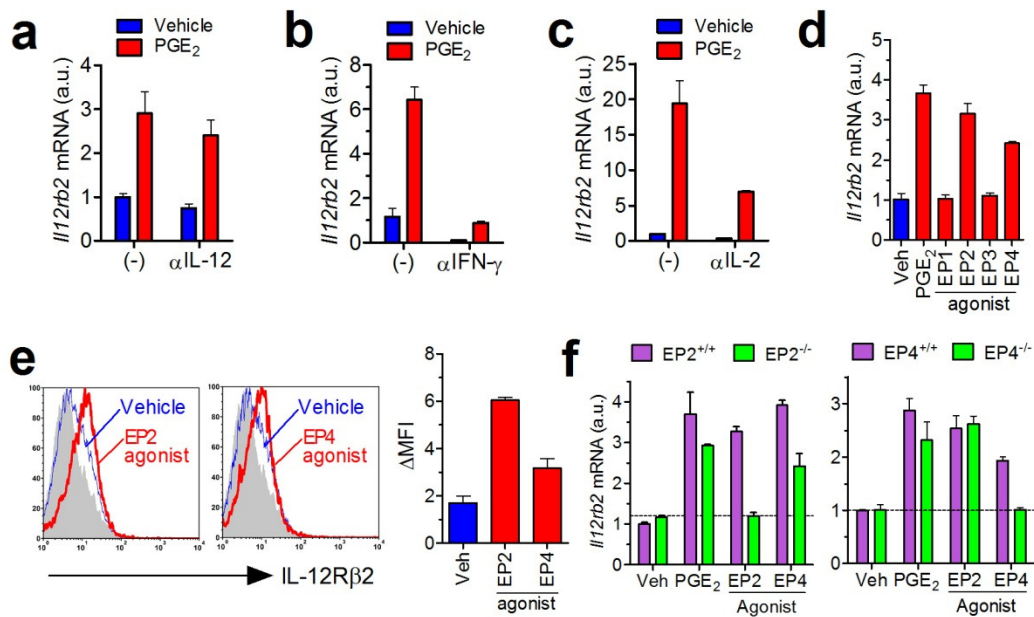

**Supplementary Figure S1. PGE<sub>2</sub>-EP2/EP4 signaling induces IL-12Rβ<sub>2</sub> expression in TCR-activated CD4<sup>+</sup> T cells.** (a,b) Expression of *Il12rb2* mRNA in WT CD4<sup>+</sup> T cells activated for 24 h with anti-CD3 and anti-CD28 in the absence or presence of PGE<sub>2</sub> with or without anti-IL-12 (a) or anti-IFN-γ (b). (c) Expression of *Il12rb2* mRNA in IFN-γR1<sup>-/-</sup> CD4<sup>+</sup> T cells activated for 24 h with anti-CD3 and anti-CD28 in the absence or presence of PGE<sub>2</sub> with or without anti-IL-2. (d) Expression of *Il12rb2* mRNA in T cells activated with αCD3/CD28 in the absence or presence of PGE<sub>2</sub> or agonists selective to EP1 to EP4 for 24 h. (e) IL-12Rβ<sub>2</sub> protein expression in T cells activated for 48 h with αCD3/CD28 in the absence or presence of PGE<sub>2</sub> or selective agonists to EP2 or EP4. (f) Expression of *Il12rb2* mRNA in WT, EP2<sup>-/-</sup> (left) and EP4<sup>-/-</sup> (right) T cells activated for 24 h with anti-CD3 and anti-CD28 in the absence or presence of PGE<sub>2</sub> or selective agonists to EP2 or EP4. Data shown as mean ± SEM are representative of two or more independent experiments with triplicates.

**Supplementary Table S1: Primer sets used for real-time PCR.**

| Gene           | Universal Probe Library, mouse* | Primer Sequence |                                   |
|----------------|---------------------------------|-----------------|-----------------------------------|
| <i>Cd69</i>    | #29                             | Forward         | 5'-AACGGAAAATAGCTCTTCACATCT-3'    |
|                |                                 | Reverse         | 5'-TGATGCTTCTCAAATGTATACTGG-3'    |
| <i>Fosb</i>    | #71                             | Forward         | 5'-GTTTCGAGAGAGCGGAAC-3'          |
|                |                                 | Reverse         | 5'-GCCTTTTCCTCTTCAAGCTG-3'        |
| <i>Gapdh</i>   | /                               | Forward         | 5'-TGAACGGGAAGCTCACTGG-3'         |
|                |                                 | Reverse         | 5'-TCCACCACCCTGTTGCTGTA-3'        |
| <i>Icer</i>    | #4                              | Forward         | 5'-GCTGAGGCTGATGAAAAACA-3'        |
|                |                                 | Reverse         | 5'-GCCACACGATTTTCAAGACA-3'        |
| <i>Ifng</i>    | #21                             | Forward         | 5'-ATCTGGAGGAACTGGCAAAA-3'        |
|                |                                 | Reverse         | 5'-TTCAAGACTTCAAAGAGTCTGAGGTA -3' |
| <i>Ifngr1</i>  | #69                             | Forward         | 5'-TCAAAGAGTTCCCTTATGTGCCTA-3'    |
|                |                                 | Reverse         | 5'-TACGAGGACGGAGAGCTGTT-3'        |
| <i>Il12rb2</i> | #103                            | Forward         | 5'-GTGCCAGGATCCCTCTCTG -3'        |
|                |                                 | Reverse         | 5'-GAATGCAACTCTGGTTCTCCA -3'      |
| <i>Il2rb</i>   | #91                             | Forward         | 5'-AGCATGGGGGAGACCTTC-3'          |
|                |                                 | Reverse         | 5'-GGGGCTGAAGAAGGACAAG-3'         |
| <i>Nr4a2</i>   | #64                             | Forward         | 5'-TCAGAGCCCACGTTCGATT-3'         |
|                |                                 | Reverse         | 5'-TAGTCAGGGTTTGCCTGGAA-3'        |
| <i>Ptger4</i>  | #77                             | Forward         | 5'-CCTAACCCACCCCTACAGGT-3'        |
|                |                                 | Reverse         | 5'-AGAAGGACGCGTTGACTCC-3'         |
| <i>Rn18s</i>   | #48                             | Forward         | 5'-GCAATTATCCCATGAACG-3'          |
|                |                                 | Reverse         | 5'-GGGACTTAATCAACGCAAGC-3'        |
| <i>Tbx21</i>   | #19                             | Forward         | 5'-TCAACCAGCACCAGACAGAG -3'       |
|                |                                 | Reverse         | 5'-AAACATCCTGTAATGGCTTGTG -3'     |

\* Universal ProbeLibrary (Roche) were used together with the LightCycler Taqman Master kit (Roche). Otherwise, FastStart DNA Master<sup>PLUS</sup> SYBR Green I kit (Roche) was used without Universal Probe Library.

**Supplementary Table S2. Primer sets used for *Ili2rb2* gene locus in ChIP assay.**

| Primer Set | Universal Probe Library, mouse* | Primer Sequence |                                      |
|------------|---------------------------------|-----------------|--------------------------------------|
| A          | /                               | Forward         | 5'-TTATGTCCTGCAGACAGGAGTG-3'         |
|            |                                 | Reverse         | 5'-CATCTGCAGGTAAATCAAAGCA-3'         |
| B          |                                 | Forward         | 5'-AGGGAAATTACTGGAATGATTTATGG-3'     |
|            |                                 | Reverse         | 5'-GACTGAGCAATTACTAGATTCTTGGA-3'     |
|            |                                 | Probe           | 5'-CTGCAGTCCAATAACCCAACAATAGGTAC-3'  |
| C          | #69                             | Forward         | 5'-CAGCACGTCTTCTGTATAAACTGG-3'       |
|            |                                 | Reverse         | 5'-TGCACTGACTTGCTAACACATCT-3'        |
| D          |                                 | Forward         | 5'-GAGACTAGGATGGAAAATATAATCAA-3'     |
|            |                                 | Reverse         | 5'-TCTGGATGAAGCCTCTCTGA-3'           |
|            |                                 | Probe           | 5'-TTCTGCAATACTCATAGATTGGTGCCTAGC-3' |
| E          |                                 | Forward         | 5'-GGACCTCACAGAGACAGAAACA-3'         |
|            |                                 | Reverse         | 5'-ACACCAAGCTAACAACCATAACATA-3'      |
|            |                                 | Probe           | 5'-ATGCAGAACTACCACAGACCCAAGCAGTC-3'  |
| F          | #110                            | Forward         | 5'-CGTCAGAAATGGAACTGAGC-3'           |
|            |                                 | Reverse         | 5'-TGCCTGTGATGAAACTCAGC-3'           |
| G          | #98                             | Forward         | 5'-TGAGTGCCACTGTGGTTATGA-3'          |
|            |                                 | Reverse         | 5'-CCAACACGTCATCCAAAATG-3'           |
| H          | /                               | Forward         | 5'-AAATTTGGGCTTTTAAATATTTTGC-3'      |
|            |                                 | Reverse         | 5'-GGCCCACTTGAGCTATGGAG-3'           |
| I          | /                               | Forward         | 5'-GTCCACTTTCGGTTTTATATGTCC-3'       |
|            |                                 | Reverse         | 5'-GAACTTGCCCAGTGCAGGAG-3'           |
| J          | #109                            | Forward         | 5'-TCTGCCTGGACACTTGTTCAT-3'          |
|            |                                 | Reverse         | 5'-GACGCAGAGAGGGATCCTG-3'            |
| K          | #82                             | Forward         | 5'-TGCCGTCACTGCTTTCAATA-3'           |
|            |                                 | Reverse         | 5'-TTCCAACAGCAAAGGAAACC-3'           |
| L          | #82                             | Forward         | 5'-TGCCGTCACTGCTTTCAATA-3'           |
|            |                                 | Reverse         | 5'-CAAATGCTGTTTCCCTGTGC-3'           |
| M          | /                               | Forward         | 5'-TAGTCCGTGTTACTGCCATCAA-3'         |
|            |                                 | Reverse         | 5'-GTAAATGACGCCTGATTAAGTGC-3'        |
| N          | #32                             | Forward         | 5'-CTCCGTGGGACATCAGAATC-3'           |
|            |                                 | Reverse         | 5'-GCCCTCATCTTCCCCT-3'               |
| O          | #50                             | Forward         | 5'-TCATGACGTCAGGTGACCTACTA-3'        |
|            |                                 | Reverse         | 5'-GCAGTTGATTATATACCCGAATTTCT-3'     |
| P          | #5                              | Forward         | 5'-TGCATTTCAAAAATATAAACCATCA-3'      |
|            |                                 | Reverse         | 5'-GATTTTGGCTTTGGGGATTT-3'           |

\* Universal Probe Library (Roche) or specified probes were used together with the LightCycler Taqman Master kit (Roche). Otherwise, FastStart DNA Master<sup>PLUS</sup> SYBR Green I kit (Roche) was used without Universal Probe Library.

**Supplementary Table S3. Primer sets used for *Ifngr1* gene locus in ChIP assay.**

| Primer Set | Universal Probe Library, mouse* | Primer Sequence |                                      |
|------------|---------------------------------|-----------------|--------------------------------------|
|            |                                 |                 |                                      |
| A          | /                               | Forward         | 5'-CATGCCACTGCAGTAAACTGTC-3'         |
|            |                                 | Reverse         | 5'-CCAGTTTGGACTCTGTCTCTTCC-3'        |
| B          | #13                             | Forward         | 5'-ACGTGTCACTCCCTGATTGG-3'           |
|            |                                 | Reverse         | 5'-GCCGAGGGTGGTTCTCTACT-3'           |
| C          | /                               | Forward         | 5'-TTCTGAAATGTGTGACGTGAGG-3'         |
|            |                                 | Reverse         | 5'-GCTCATCGACCCTTAACAAAAA-3'         |
| D          | /                               | Forward         | 5'-CTATTCCTTCCCCCTTAATCTCC-3'        |
|            |                                 | Reverse         | 5'-CTGTGCGCATGCTTCCTAAG-3'           |
| E          |                                 | Forward         | 5'-CCCACACGCACACGCATG-3'             |
|            |                                 | Reverse         | 5'-CCACTGAGGAAGAGGCACTGTA-3'         |
|            |                                 | Probe           | 5'-CGCACGCACGTCTGATACTGTAATCTCATT-3' |
| F          | #16                             | Forward         | 5'-CCTCAGTGGATACAAGGTCCA-3'          |
|            |                                 | Reverse         | 5'-GGATACCCAAGATATAGCTATGCAG-3'      |
| G          | /                               | Forward         | 5'-CGGAAACACTTAACTCCCAAGC-3'         |
|            |                                 | Reverse         | 5'-CCATTTCTGAGGAAGGATCTGG-3'         |
| H          | #64                             | Forward         | 5'-CACTTCATAATCTGCTTCCTGGT-3'        |
|            |                                 | Reverse         | 5'-ATGCGGCTTGCAGATTTT-3'             |
| I          | /                               | Forward         | 5'-CATCTGTAGCACCAAGGGTGAG-3'         |
|            |                                 | Reverse         | 5'-CCTTGTGCAGGTTCAAGATTGAG-3'        |
| J          | #107                            | Forward         | 5'-TTTATCCTGACGTCAAAGTCTGAG-3'       |
|            |                                 | Reverse         | 5'-CCAGCTAAGGCTTGTATTTGTC-3'         |
| K          | /                               | Forward         | 5'-TGACGTCAAAGTCTGAGAAATGC-3'        |
|            |                                 | Reverse         | 5'-TCTCTGAGTCTTCCAAGCAAAATG-3'       |
| L          | /                               | Forward         | 5'-TGTAGGAGGGGGTGCAAATG-3'           |
|            |                                 | Reverse         | 5'-ACACTCTTGTGCTGCCTCACTC-3'         |
| M          |                                 | Forward         | 5'-CCAGGCTGGTCTCTCAAGCTT-3'          |
|            |                                 | Reverse         | 5'-CCTGGCCTTGGCGTCA-3'               |
|            |                                 | Probe           | 5'-CTTGCGGACTTGGC-3'                 |
| N          | /                               | Forward         | 5'-GATTCTGCTGGTGGTCCTGAT-3'          |
|            |                                 | Reverse         | 5'-CAGCGGCTCGGAGAGATTAC-3'           |
| O          | /                               | Forward         | 5'-GGCATGGGGAGACCTCTTTAAC-3'         |
|            |                                 | Reverse         | 5'-AATCAGGTCAAGCAGGATTG-3'           |
| P          | #40                             | Forward         | 5'-GGCCAAAGCGAGACTGAA-3'             |
|            |                                 | Reverse         | 5'-GACGTCAGACATGGAGATGC-3'           |

\* Universal Probe Library (Roche) or specified probes were used together with the LightCycler Taqman Master kit (Roche). Otherwise, FastStart DNA Master<sup>PLUS</sup> SYBR Green I kit (Roche) was used without Universal Probe Library.
